# Supplementary material for: Removal of Antibiotics from Real Hospital Wastewater by Cold Plasma Technique
Source: Hindawi journal article supplement (doi:10.1155/2021/9981738), 2021-05-20
Supplement: f1 [file 9981738.f1.zip]

Archive with 2 entries (2 files):
- 9981738.f1/Supplemental Figures.docx
- 9981738.f1/Supplemental Table.docx
