# Supplementary material for: Removal of Antibiotics from Real Hospital Wastewater by Cold Plasma Technique
Source: Hindawi journal article supplement (doi:10.1155/2021/9981738), 2021-05-20
Supplement: f1 [file 9981738.f1.zip › 9981738.f1/Supplemental Figures.docx]

Supplemental Figure


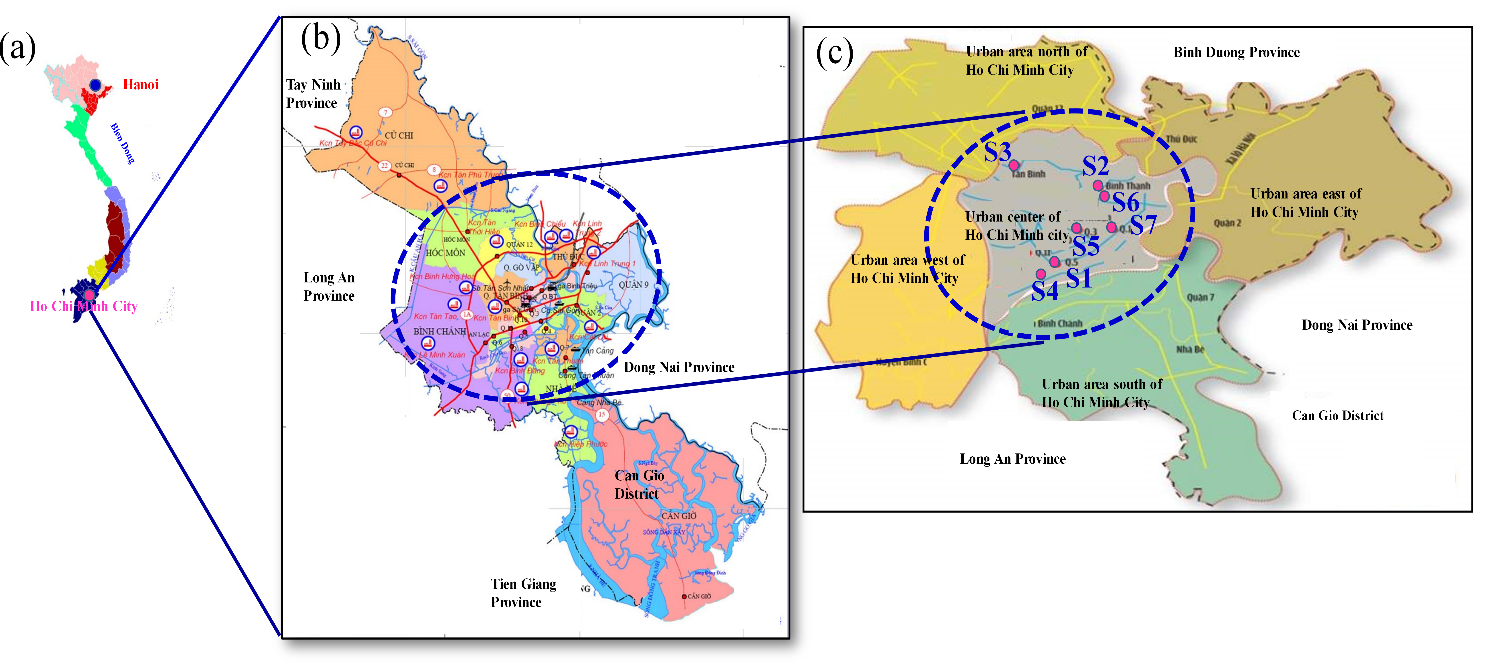


**Figure S1.** The study area and regional map (a). Ho Chi Minh City area (b), and Hospital sampling site in Ho Chi Minh City (c)

*S1: Odonto-Stomatology, District 5; S2: Oncology, Bình Thạnh District; S3: Thong Nhat, Tan Binh District; S4: Hung Vuong, District 5; S5: Binh Dan, District 3; S6: Gia Dinh, Bình Thạnh District; and S7: General Saigon, District 1.*

| **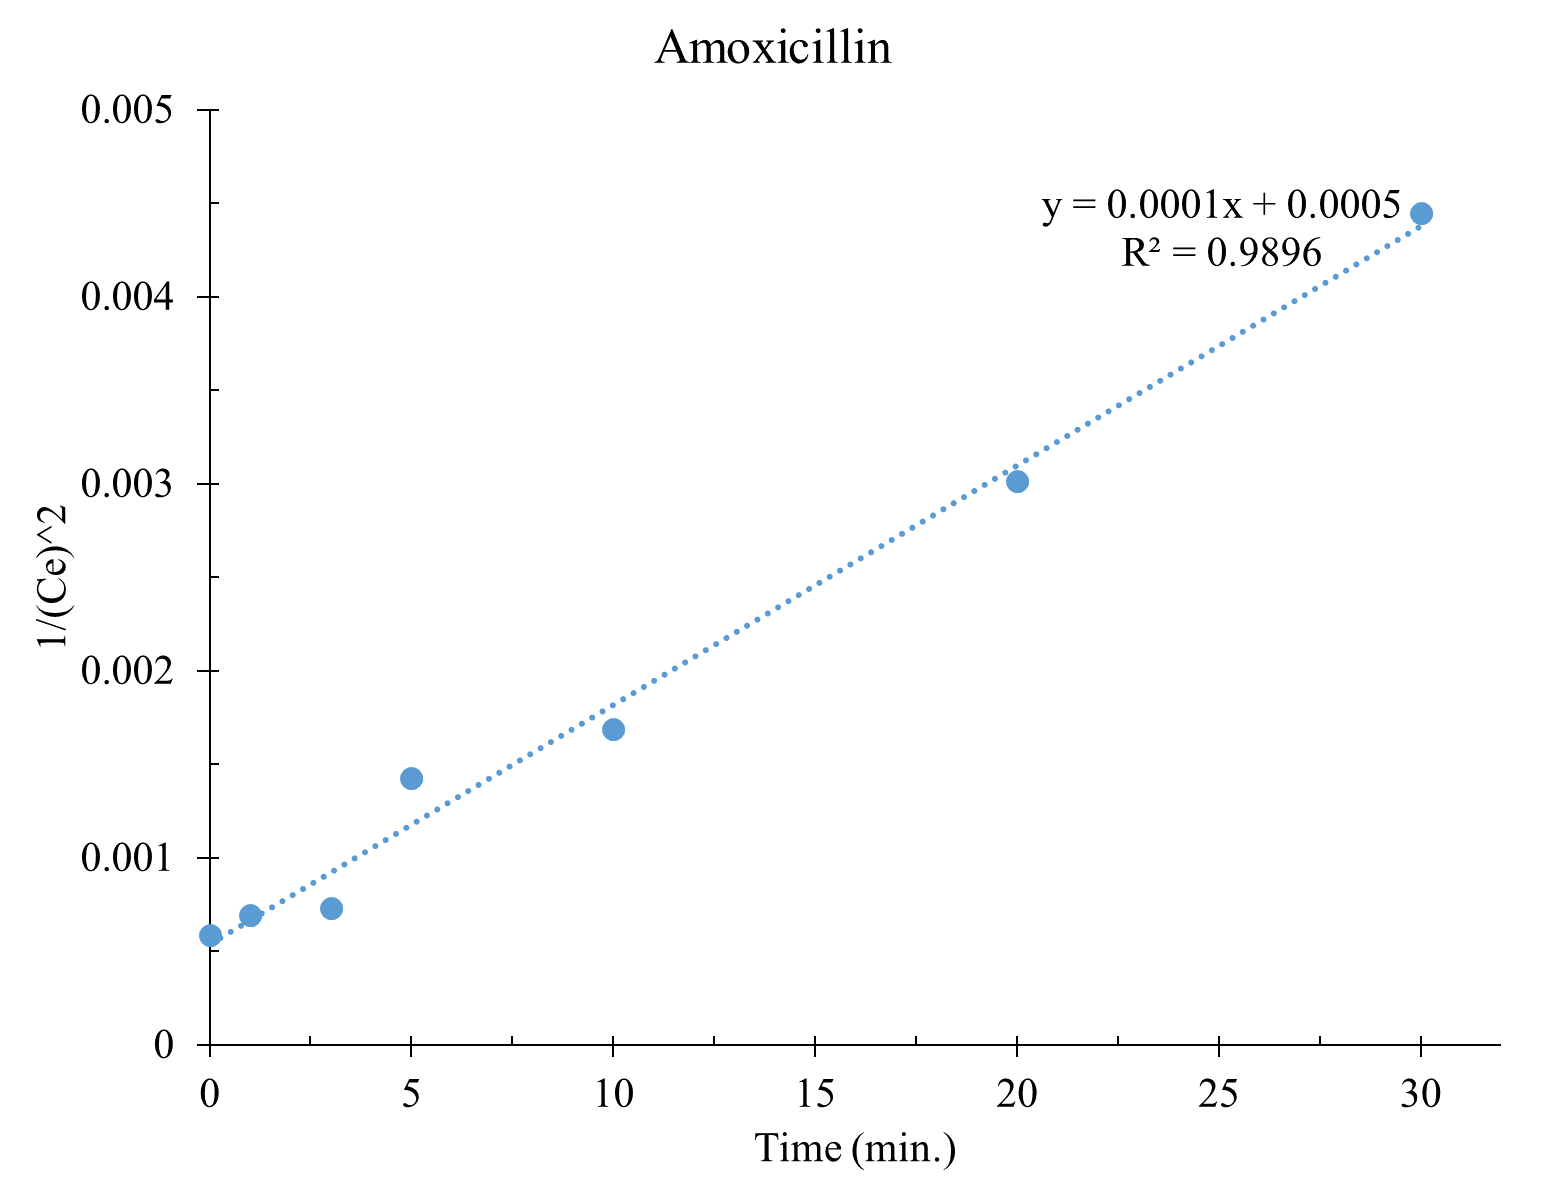**  a) | **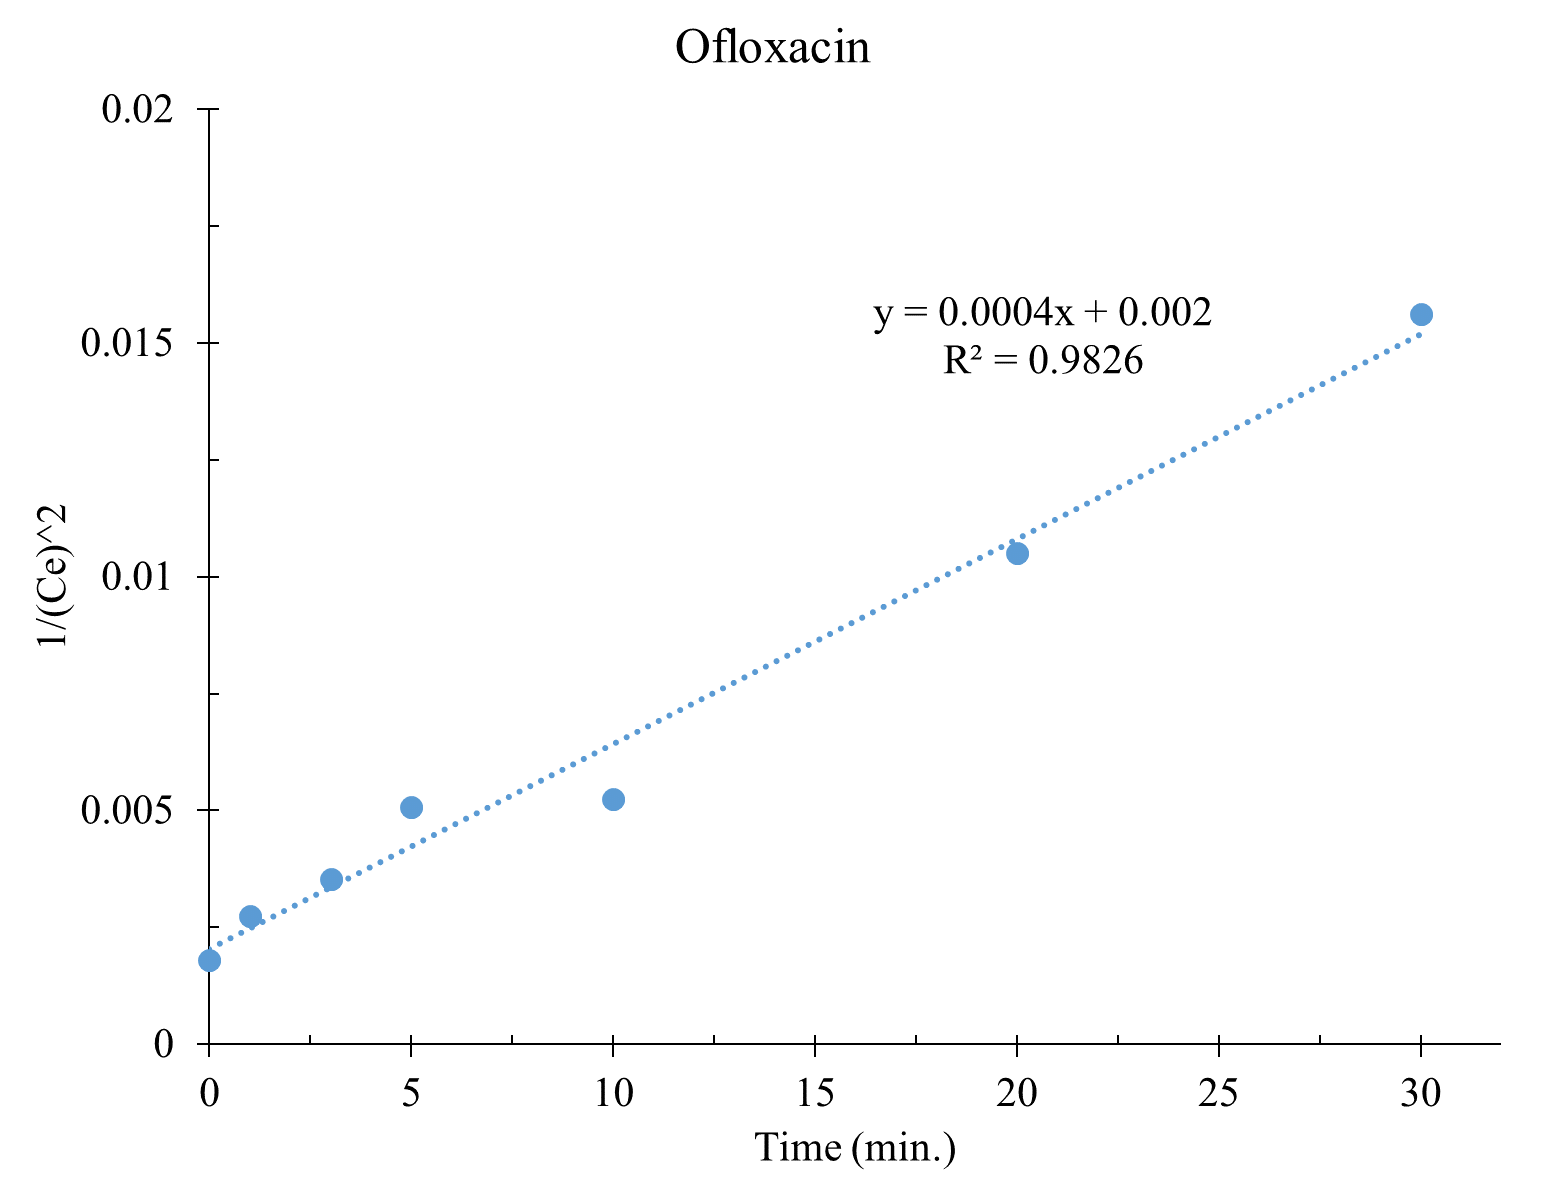**  b) |
| --- | --- |
| **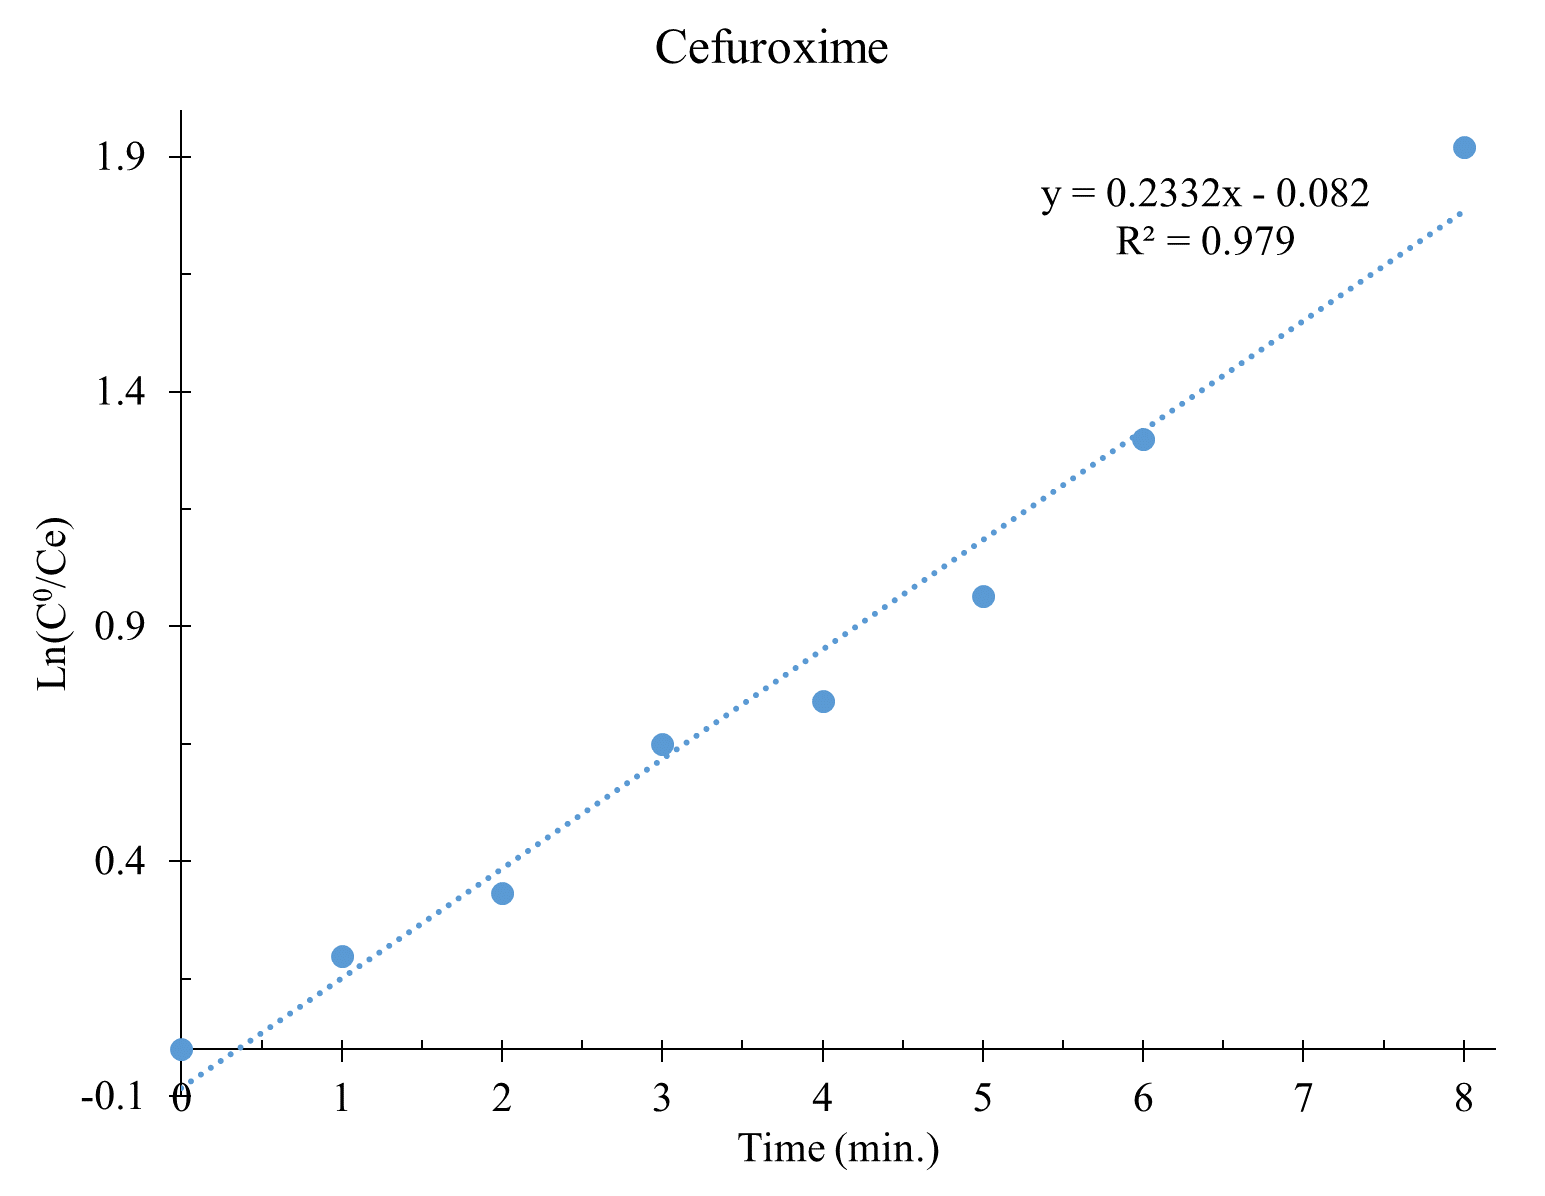**  c) | **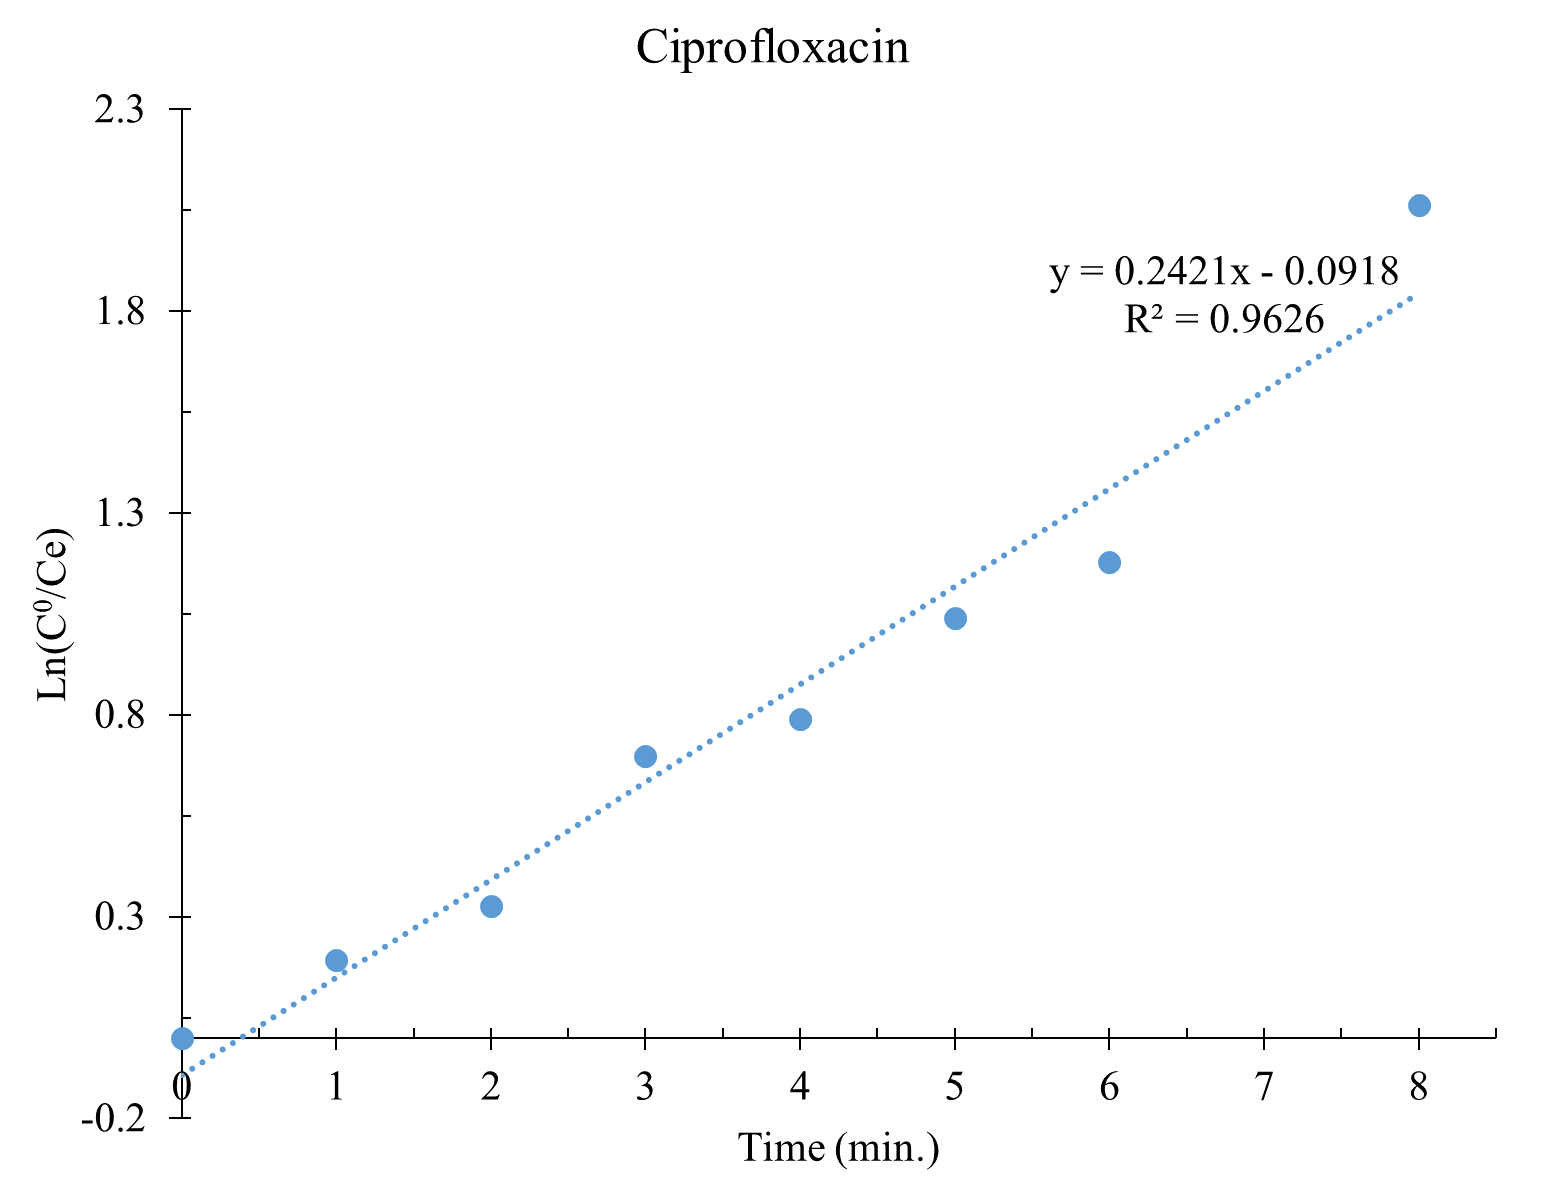**  d) |

Figure S2. Third-order reaction kinetics models of a) ofloxacin and b) amoxicillin, and first-order reaction kinetics models of c) ciprofloxacin and d) cefuroxime
