# Supplementary material for: Removal of Antibiotics from Real Hospital Wastewater by Cold Plasma Technique
Source: Hindawi journal article supplement (doi:10.1155/2021/9981738), 2021-05-20
Supplement: f1 [file 9981738.f1.zip › 9981738.f1/Supplemental Table.docx]

Supplemental Table

**Table S1**. Evaluated factors and their established ranges for the plasma tests

| Factors | Range of values |
| --- | --- |
| Applied voltage (kV) | 15, 20, 25, 30 and 35 |
| Reaction time (min) | 5, 10, 15, 20 and 25 |
| Initial pH | 6.6, 7, 8, 9 and 10 |
| Distance between two electrodes (cm) | 1, 1.5, 2.0, 2.5 and 3.0 |

**Table S2***.* Characterization of wastewater from the seven hospitals

| **Parameters** (mg/L) | **Hospital** | | | | | | | | | | | | | | |
| --- | --- | --- | --- | --- | --- | --- | --- | --- | --- | --- | --- | --- | --- | --- | --- |
| Odonto-Stomatology | | Oncology | | Thong Nhat | | Hung Vuong | | Binh Dan | | Gia Dinh | | General Saigon | | |
| Influent | Effluent | Influent | Effluent | Influent | Effluent | Influent | Effluent | Influent | Effluent | Influent | Effluent | Influent | Effluent |
| pH | 5.3±0.2 | 5.9±0.3 | 6.9±0.2 | 7.7±0.3 | 5.9±0.2 | 5.6±0.3 | 6.7±0.2 | 5.8±0.3 | 6.9±0.4 | 7.5±0.3 | 6.7±0.4 | 7.4±0.3 | 6.7±0.3 | 6.9±0.3 |
| COD | 390±15 | 14±4 | 354±6 | 79±5 | 244±4 | 30±4 | 539±15 | 191±12 | 285±18 | 57±7 | 280±21 | 14±5 | 272±19 | 75±5 |
| TSS | 26.7±3.3 | 20.3±2.5 | 169±13.3 | 70.4±6.5 | 109±6.3 | 14.7±2.5 | 188±9.3 | 279±11 | 43.2±11.4 | 28.8±4.5 | 70.5±10.2 | 21.8±4.5 | 165.5±15.5 | 35.2±5.6 |
| Sulphur | 0.041±0.002 | 0.032±0.003 | 7.481±2.11 | 2.85±0.067 | 0.418±0.002 | 0.028±0.003 | 7.136±2.87 | 0.028±0.002 | 5.87±2.24 | 3.03±0.5 | 5.85±3.84 | 0.3±0.01 | 4.18±1.94 | 0.1±0.01 |
| Ammonia | 19.18±6.37 | 19.18±6.37 | 52.98±8.57 | 19.5±5.81 | 24.27±3.32 | 19.74±4.18 | 57.52±7.47 | 2.19±1.25 | 57.25±9.55 | 14.58±5.6 | 32.5±8.12 | 4.85±3.6 | 25.8±10.2 | 8.15±2.1 |
| Nitrates | 3.26±0.01 | 0.32±0.01 | 1.14±0.54 | 0.65±0.01 | 2.18±0.67 | 0.51±0.03 | 3.05±0.54 | 0.25±0.02 | 1.28±0.64 | 0.55±0.04 | 2.34±0.55 | 0.46±0.02 | 1.34±0.05 | 0.75±0.01 |
| Phosphate | 2.833±0.52 | 1.080±0.8 | 4.79±2.05. | 2.90±1.31 | 3.16±1.67 | 2.61±1.20 | 4.87±2.05 | 3.09±1.41 | 6.16±1.5 | 3.44±1.08 | 3.27±1.6 | 1.79±0.5 | 5.32±2.1 | 2.76±0.5 |
| Oil and grease | 0.574±0.045 | 0.267±0.012 | 0.396±0.04 | 0.19±0.02 | 1.233±0.04 | 0.963±0.05 | 0.23±0.07 | 0.10±0.01 | 0.67±0.03 | 0.23±0.02 | 0.26±0.03 | 0.22±0.03 | 0.23±0.03 | 0.19±0.03 |
| Coliforms* | 4.3×105±650 | 9×104±253 | 1×106±205 | 1.1×104±140 | 1.2×107±206 | 5×103±80 | 1.4×107±130 | 1.8×105±40 | 1.5×105±232 | 1.2×104±170 | 5.5×105±295 | ND | 2.2×106±645 | 4.2×103±350 |
| Ofloxacin | ND | ND | 22.12±3.13 | 12.232.95 | ND | ND | ND | ND | 13.78±7.45 | 5.58±3.11 | ND | ND | ***48.85±6.76*** | 19.95±4.22 |
| Ciprofloxacin | ND | ND | 6.23±1.7 | ND | 10.07±3.12 | ND | 168.15±8.46 | 60.029±7.37 | ND | ND | 18.37±4.9 | ND | ***5.90±0.11*** | ND |
| Cefuroxime | 0.165±0.25 | ND | ND | ND | ND | ND | 31.610±6.63 | ND | 0.32±1.2 | 0.11±0.54 | 0.86±0.24 | 0.84±0.45 | ***0.35±0.08*** | ND |
| Amoxicillin | 56.33±4.92 | 28.81±3.45 | 23.4±5.61 | 13.523.12 | 47.58±5.68 | 25.35±4.81 | 78.12±11.27 | 32.070±8.95 | 28.8±3.97 | 12.21±2.59 | 36.72±8.20 | 12.07±5.94 | ***26.27± 2.47*** | 11.86±2.02 |

*Unit-CFU/100 mL, ND: Non-detected (<0.1 mg/L and <1 CFU/100 mL for antibiotics and coliforms, respectively)
